# Supplementary material
Source: HighWire-hosted journal article supplement (https://bmjopen.bmj.com/content/10/3/e033023)
Supplement: inline-supplementary-material-1 [file inline-supplementary-material-1.pdf]

**SUPPLEMENTARY FILE****Search strategies*****PubMed***

1. "Contrast Media"[Pharmacological Action]
2. radiocontrast\*
3. iodinated contrast\*
4. contrast material\*
5. iodine contrast\*
6. iodixanol OR iohexol OR iopamidol OR ioversol OR ioxilan OR iopromide OR iobitridol OR iomeprol
7. #1 OR #2 OR #3 OR #4 OR #5 OR #6
8. "Adverse Effects"[Subheading]
9. Adverse
10. "side effect"
11. "side effects"
12. reaction\*
13. harm\*
14. complicat\*
15. toxicit\*
16. hypersensitiv\*
17. breakthrough reaction\*
18. anaphyla\*
19. allerg\*
20. #8 OR #9 OR #10 OR #11 OR #12 OR #13 OR #14 OR #15 OR #16 OR #17 OR #18 OR #19
21. Premedication[Mesh]
22. premedicat\*
23. prevent\*
24. prophyla\*
25. steroid\*
26. corticosteroid\*
27. antihistamine\*
28. #21 OR #22 OR #23 OR #24 OR #25 OR #26 OR #27
29. #7 AND #20 AND #28

***Cochrane Central Register of Controlled Trials (Ovid)***

1. contrast media.mp. or exp Contrast Media/
2. radiocontrast\*.mp.
3. iodinated contrast\*.mp.
4. contrast material\*.mp.
5. Iodine/ or iodine contrast\*.mp.
6. (iodixanol or iohexol or iopamidol or ioversol or ioxilan or iopromide or iobitridol or iomeprol).mp. [mp=title, original title, abstract, mesh headings, heading words, keyword]
7. 1 or 2 or 3 or 4 or 5 or 6
8. Adverse Effects.mp.
9. "Drug-Related Side Effects and Adverse Reactions"/ or adverse.mp.
10. side effect.mp.
11. side effects.mp.
12. reaction\*.mp.
13. Patient Harm/ or harm\*.mp.
14. complicat\*.mp.
15. toxicit\*.mp.
16. Hypersensitivity/ or hypersensitiv\*.mp.
17. breakthrough reaction\*.mp. [mp=title, original title, abstract, mesh headings, heading words, keyword]
18. Anaphylaxis/ or anaphyla\*.mp.
19. allerg\*.mp.
20. 8 or 9 or 10 or 11 or 12 or 13 or 14 or 15 or 16 or 17 or 18 or 19
21. premedication.mp. or Premedication/
22. premedicat\*.mp.
23. prevent\*.mp.
24. prophyla\*.mp.
25. steroid\*.mp.
26. Glucocorticoids/ or corticosteroid\*.mp.
27. antihistamine\*.mp. or Histamine H1 Antagonists/
28. 21 or 22 or 23 or 24 or 25 or 26 or 27
29. 7 and 20 and 28

***Embase***

1. 'contrast medium'/exp OR 'contrast medium'
2. radiocontrast\*
3. 'iodinated contrast medium'/exp OR 'iodinated contrast medium'
4. iodinated AND contrast\*
5. ('contrast'/exp OR contrast) AND material\*
6. ('iodine'/exp OR iodine) AND contrast\*
7. 'iodixanol'/exp OR iodixanol OR 'iohexol'/exp OR iohexol OR 'iopamidol'/exp OR iopamidol OR 'ioversol'/exp OR ioversol OR 'ioxilan'/exp OR ioxilan OR 'iopromide'/exp OR iopromide OR 'iobitridol'/exp OR iobitridol OR 'iomeprol'/exp OR iomeprol
8. #1 OR #2 OR #3 OR #4 OR #5 OR #6 OR #7
9. 'adverse event'/exp OR 'adverse event'
10. Adverse
11. 'side effect'/exp OR 'side effect'
12. 'side effects'
13. reaction\*
14. harm\*
15. 'complication'/exp OR 'complication'
16. complicat\*
17. 'toxicity'/exp OR 'toxicity'
18. toxicit\*
19. 'hypersensitivity'/exp OR 'hypersensitivity'
20. hypersensitiv\*
21. breakthrough AND reaction\*
22. 'anaphylaxis'/exp OR 'anaphylaxis'
23. anaphyla\*
24. allerg\*
25. 'immediate type hypersensitivity'/exp OR 'immediate type hypersensitivity'
26. 'allergy'/exp OR 'allergy'
27. #9 OR #10 OR #11 OR #12 OR #13 OR #14 OR #15 OR #16 OR #17 OR #18 OR #19 OR #20 OR #21 OR #22 OR #23 OR #24 OR #25 OR #26
28. 'premedication'/exp OR 'premedication'
29. premedicat\*
30. 'prevention'/exp OR 'prevention'
31. prevent\*

32. 'prophylaxis'/exp OR 'prophylaxis'
33. prophyla\*
34. 'steroid'/exp OR 'steroid'
35. steroid\*
36. 'corticosteroid'/exp OR 'corticosteroid'
37. corticosteroid\*
38. 'antihistaminic agent'/exp OR 'antihistaminic agent'
39. 'histamine h1 receptor antagonist'/exp OR 'histamine h1 receptor antagonist'
40. antihistamine\*
41. #28 OR #29 OR #30 OR #31 OR #32 OR #33 OR #34 OR #35 OR #36 OR #37 OR  
#38 OR #39 OR #40
42. #8 AND #27 AND #41
43. #42 AND ('article'/it OR 'article in press'/it OR 'conference paper'/it OR 'short  
survey'/it)
